# Supplementary material
Source: PubMed Central journal article supplement (PMC7263738)
Supplement: ehp6174.s001.acco.pdf [file ehp6174.s001.acco.pdf]

**Note to readers with disabilities:** *EHP* strives to ensure that all journal content is accessible to all readers. However, some figures and Supplemental Material published in *EHP* articles may not conform to [508 standards](#) due to the complexity of the information being presented. If you need assistance accessing journal content, please contact [ehp508@niehs.nih.gov](mailto:ehp508@niehs.nih.gov). Our staff will work with you to assess and meet your accessibility needs within 3 working days.

### **Supplemental Material**

#### **Genome-Wide DNA Methylation in Peripheral Blood and Long-Term Exposure to Source-Specific Transportation Noise and Air Pollution: The SAPALDIA Study**

Ikenna C. Eze, Ayoung Jeong, Emmanuel Schaffner, Faisal I. Rezwan, Akram Ghantous, Maria Foraster, Danielle Vienneau, Florian Kronenberg, Zdenko Herceg, Paolo Vineis, Mark Brink, Jean-Marc Wunderli, Christian Schindler, Christian Cajochen, Martin Röösl, John W. Holloway, Medea Imboden, and Nicole Probst-Hensch

#### **Table of Contents**

**Table S1.** Spearman rank correlations of transportation noise and air pollutions exposures among the SAPALDIA participants included in the present study.

**Table S2.** Summary of the included participants, stratified and survey and nested study.

**Table S3.** Top ten CpGs independently associated with source-specific transportation noise and air pollution in the SAPALDIA study, single exposure models.

**Table S4.** Top ten CpGs independently associated with source-specific transportation noise and air pollution in the multi-exposure model, stratified by nested study.

**Table S5.** Sensitivity of source-specific transportation noise and air pollution-related CpGs to nighttime window-opening behavior of participants.

**Table S6.** Sensitivity of source-specific transportation noise and air pollution-related CpGs to “non-winsorization” of extreme methylation values.

**Table S7.** Sensitivity of source-specific transportation noise and air pollution-related CpGs to exclusion of leukocyte composition from main model.

**Table S8.** Association between source-specific transportation noise and air pollution exposures, and leukocyte composition in the SAPALDIA study.

**Figure S1.** Distributions of the BMIQ-normalized beta values (A) and technical bias-corrected residuals (B) in the SAPALDIA study. SAPALDIA: Swiss cohort study on air pollution and lung and heart diseases in adults.

**Figure S2.** Distribution of transportation noise and air pollution parameters in the present study.

**Additional File-** Excel Document

Table S1. Spearman rank correlations of transportation noise and air pollutions exposures among the SAPALDIA participants included in the present study.

|                                        | Aircraft Lden (dB) | Railway Lden (dB) | Road traffic Lden (dB) | Aircraft Lnight (dB) | Railway Lnight (dB) | Road traffic Lnight (dB) | NO <sub>2</sub> (µg/m <sup>3</sup> ) | PM <sub>2.5</sub> (µg/m <sup>3</sup> ) |
|----------------------------------------|--------------------|-------------------|------------------------|----------------------|---------------------|--------------------------|--------------------------------------|----------------------------------------|
| All; n = 2,542                         |                    |                   |                        |                      |                     |                          |                                      |                                        |
| Aircraft Lden (dB)                     | 1                  |                   |                        |                      |                     |                          |                                      |                                        |
| Railway Lden (dB)                      | 0.15               | 1                 |                        |                      |                     |                          |                                      |                                        |
| Road traffic Lden (dB)                 | 0.017              | 0.08              | 1                      |                      |                     |                          |                                      |                                        |
| Aircraft Lnight (dB)                   | 0.76               | 0.01              | 0.06                   | 1                    |                     |                          |                                      |                                        |
| Railway Lnight(dB)                     | 0.17               | 0.97              | 0.07                   | 0.02                 | 1                   |                          |                                      |                                        |
| Road traffic Lnight (dB)               | 0.02               | 0.08              | 0.99                   | 0.06                 | 0.07                | 1                        |                                      |                                        |
| NO <sub>2</sub> (µg/m <sup>3</sup> )   | 0.09               | 0.23              | 0.40                   | 0.15                 | 0.25                | 0.40                     | 1                                    |                                        |
| PM <sub>2.5</sub> (µg/m <sup>3</sup> ) | 0.25               | 0.19              | 0.19                   | 0.23                 | 0.21                | 0.20                     | 0.65                                 | 1                                      |
| SAPALDIA2; n = 1,170                   |                    |                   |                        |                      |                     |                          |                                      |                                        |
| Aircraft Lden (dB)                     | 1                  |                   |                        |                      |                     |                          |                                      |                                        |
| Railway Lden (dB)                      | 0.22               | 1                 |                        |                      |                     |                          |                                      |                                        |
| Road traffic Lden (dB)                 | 0.04               | 0.09              | 1                      |                      |                     |                          |                                      |                                        |
| Aircraft Lnight (dB)                   | 0.89               | 0.16              | 0.11                   | 1                    |                     |                          |                                      |                                        |
| Railway Lnight(dB)                     | 0.24               | 0.98              | 0.08                   | 0.17                 | 1                   |                          |                                      |                                        |
| Road traffic Lnight (dB)               | 0.04               | 0.09              | 0.99                   | 0.11                 | 0.08                | 1                        |                                      |                                        |
| NO <sub>2</sub> (µg/m <sup>3</sup> )   | 0.20               | 0.17              | 0.39                   | 0.36                 | 0.19                | 0.40                     | 1                                    |                                        |
| PM <sub>2.5</sub> (µg/m <sup>3</sup> ) | 0.25               | 0.20              | 0.20                   | 0.34                 | 0.22                | 0.20                     | 0.72                                 | 1                                      |
| SAPALDIA3; n = 1,372                   |                    |                   |                        |                      |                     |                          |                                      |                                        |
| Aircraft Lden (dB)                     | 1                  |                   |                        |                      |                     |                          |                                      |                                        |
| Railway Lden (dB)                      | 0.13               | 1                 |                        |                      |                     |                          |                                      |                                        |
| Road traffic Lden (dB)                 | -0.01              | 0.07              | 1                      |                      |                     |                          |                                      |                                        |
| Aircraft Lnight (dB)                   | 0.61               | -0.06             | 0.03                   | 1                    |                     |                          |                                      |                                        |
| Railway Lnight(dB)                     | 0.15               | 0.97              | 0.06                   | -0.06                | 1                   |                          |                                      |                                        |
| Road traffic Lnight (dB)               | -0.01              | 0.08              | 0.99                   | 0.03                 | 0.07                | 1                        |                                      |                                        |
| NO <sub>2</sub> (µg/m <sup>3</sup> )   | 0.07               | 0.25              | 0.42                   | 0.03                 | 0.26                | 0.42                     | 1                                    |                                        |
| PM <sub>2.5</sub> (µg/m <sup>3</sup> ) | 0.28               | 0.13              | 0.23                   | 0.22                 | 0.14                | 0.23                     | 0.58                                 | 1                                      |

SAPALDIA: Swiss cohort study on air pollution and lung and heart diseases in adults. SAPALDIA2 and SAPALDIA3 represent the second and third waves of the SAPALDIA study. Lden: day-evening night noise level; Lnight: nighttime noise level; NO<sub>2</sub>: nitrogen dioxide; PM<sub>2.5</sub>: particulate matter with aerodynamic diameter <2.5 µm.

Table S2. Summary of the included participants, stratified and survey and nested study

| Categorical variables, <i>n</i> (%)               | SAPALDIA2 <sup>a</sup> |            |             | SAPALDIA3 <sup>a</sup> |            |             |
|---------------------------------------------------|------------------------|------------|-------------|------------------------|------------|-------------|
|                                                   | All                    | ALEC       | EXPOS-OMICS | All                    | ALEC       | EXPOS-OMICS |
| All                                               | 1,170 (100)            | 972 (100)  | 198 (100)   | 1,372 (100)            | 970 (100)  | 402 (100)   |
| Women                                             | 623 (53)               | 521 (54)   | 102 (52)    | 737 (54)               | 519 (54)   | 218 (54)    |
| Formal education, ≤9 years                        | 56 (5)                 | 54 (6)     | 2 (1)       | 62 (4)                 | 54 (5)     | 8 (2)       |
| Formal education, 10-12 years                     | 759 (65)               | 634 (65)   | 125 (63)    | 887 (65)               | 636 (66)   | 251 (62)    |
| Formal education, >12 years                       | 355 (30)               | 284 (29)   | 71 (36)     | 423 (31)               | 280 (29)   | 143 (36)    |
| Smoking status, never                             | 539 (46)               | 402 (41)   | 137 (69)    | 659 (48)               | 396 (41)   | 263 (65)    |
| Smoking status, former                            | 355 (30)               | 294 (30)   | 61 (31)     | 496 (36)               | 157 (37)   | 139 (35)    |
| Smoking status, current                           | 276 (24)               | 276 (29)   | 0 (0)       | 217 (16)               | 217 (22)   | 0 (0)       |
| Passive smoke exposure                            | 289 (25)               | 257 (26)   | 32 (16)     | 159 (12)               | 136 (14)   | 23 (6)      |
| Alcohol intake >1 glass per day                   | 456 (39)               | 377 (39)   | 79 (40)     | 529 (38)               | 374 (39)   | 147 (37)    |
| Fruit intake ≤3days/week                          | 326 (28)               | 183 (29)   | 43 (22)     | 280 (20)               | 212 (22)   | 68 (17)     |
| Vegetable intake ≤3days/week                      | 86 (7)                 | 74 (7)     | 12 (6)      | 100 (7)                | 73 (8)     | 27 (7)      |
| Urban area                                        | 689 (59)               | 588 (60)   | 101 (51)    | 897 (60)               | 587 (61)   | 230 (57)    |
| Prevalent asthma                                  | 161 (14)               | 161 (17)   | 0 (0)       | 398 (21)               | 194 (20)   | 204 (51)    |
| MVPA <150 minutes per week                        | 330 (28)               | 286 (29)   | 44 (22)     | 354 (26)               | 263 (27)   | 91 (23)     |
| Regular nighttime opening of windows              | 971 (83)               | 808 (83)   | 163 (82)    | 1,131 (82)             | 797 (82)   | 334 (83)    |
| Continuous variables, median (IQR)                |                        |            |             |                        |            |             |
| Age                                               | 50 (18)                | 50 (18)    | 49 (15)     | 58 (18)                | 59 (18)    | 57 (18)     |
| Body mass index (kg/m <sup>2</sup> )              | 24.9 (5)               | 25.1 (6)   | 24.1 (4)    | 25.8 (6)               | 24.8 (5)   | 24.6 (5)    |
| Smoking pack years                                | 0.4 (15)               | 2.0 (18)   | 0 (1)       | 0 (14)                 | 2.1 (21)   | 0 (3)       |
| Neighborhood index of socio-economic position (%) | 64.6 (13)              | 64.4 (13)  | 65.1 (13)   | 64.8 (13)              | 64.7 (13)  | 65.1 (13)   |
| Greenness index within 1 km buffer                | 0.61 (0.2)             | 0.61 (0.2) | 0.63 (0.2)  | 0.62 (0.2)             | 0.62 (0.2) | 0.63 (0.2)  |
| Aircraft Lden (dB)                                | 30 (9)                 | 30 (10)    | 30 (8)      | 32.7 (8)               | 33.4 (8)   | 31.7 (7)    |
| Railway Lden (dB)                                 | 30 (11)                | 30.4 (11)  | 30 (10)     | 30 (7)                 | 30 (7)     | 30 (7)      |
| Road traffic Lden (dB)                            | 53.7 (11)              | 53.8 (11)  | 53.2 (10)   | 53.9 (11)              | 53.9 (11)  | 53.5 (11)   |
| NO <sub>2</sub> (µg/m <sup>3</sup> )              | 20.2 (14)              | 20.4 (14)  | 19.7 (15)   | 16.7 (10)              | 16.7 (9)   | 16.7 (10)   |
| PM <sub>2.5</sub> (µg/m <sup>3</sup> )            | 14.3 (5)               | 14.3 (5)   | 13.9 (5)    | 12.9 (2)               | 12.9 (2)   | 12.9 (2)    |

SAPALDIA: Swiss Cohort Study on Air Pollution and Lung and Heart Diseases in Adults. ALEC: Aging lungs in European cohorts. ALEC and EXPOSOMICS are European cohort consortia in which SAPALDIA participates. MVPA: moderate to vigorous physical activity. PM<sub>2.5</sub>: particulate matter with aerodynamic diameter <2.5 µm. NO<sub>2</sub>: nitrogen dioxide. <sup>a</sup> Population included in the analysis was limited to participants with complete methylome, exposure, and covariate data.

Table S3. Top ten CpGs independently associated with source-specific transportation noise and air pollution in the SAPALDIA study, single exposure models.

| Exposure          | CpG ID     | CHR       | Location     | Gene            | Feature | Model 1 |          |          |         | Model 2 |          |          |
|-------------------|------------|-----------|--------------|-----------------|---------|---------|----------|----------|---------|---------|----------|----------|
|                   |            |           |              |                 |         | Beta    | SE       | P-value  | P (FDR) | Beta    | SE       | P-value  |
| Aircraft Lden     | cg02286155 | 5         | 176826262    | <i>N.A</i>      | N.A.    | -0.007  | 0.001    | 8.05E-07 | 0.347   | -0.007  | 0.001    | 1.08E-06 |
|                   | cg21602842 | 18        | 46291908     | <i>KIAA0427</i> | Body    | -0.005  | 0.001    | 6.91E-06 | 0.579   | -0.005  | 0.001    | 6.65E-06 |
|                   | cg09042449 | 10        | 44064225     | <i>ZNF239</i>   | 5UTR    | -0.002  | 0.0004   | 7.30E-06 | 0.579   | -0.002  | 0.000    | 8.33E-06 |
|                   | cg16218477 | 7         | 1066167      | <i>C7orf50</i>  | Body    | -0.004  | 0.001    | 8.15E-06 | 0.579   | -0.004  | 0.001    | 6.82E-06 |
|                   | cg10975000 | 13        | 28371375     | <i>N.A</i>      | N.A.    | -0.002  | 0.001    | 1.12E-05 | 0.579   | -0.002  | 0.001    | 1.15E-05 |
|                   | cg22979422 | 12        | 56694490     | <i>CS</i>       | TSS1500 | -0.010  | 0.002    | 1.27E-05 | 0.579   | -0.010  | 0.002    | 1.22E-05 |
|                   | cg15063530 | 2         | 17716941     | <i>N.A</i>      | N.A.    | -0.009  | 0.002    | 1.29E-05 | 0.579   | -0.009  | 0.002    | 1.28E-05 |
|                   | cg21903378 | 14        | 104686811    | <i>N.A</i>      | N.A.    | -0.009  | 0.002    | 1.52E-05 | 0.579   | -0.008  | 0.002    | 2.18E-05 |
|                   | cg04635504 | 11        | 2829241      | <i>KCNQ1</i>    | Body    | -0.005  | 0.001    | 1.63E-05 | 0.579   | -0.005  | 0.001    | 1.59E-05 |
| cg25462190        | 5          | 177547067 | <i>N4BP3</i> | Body            | -0.007  | 0.002   | 1.66E-05 | 0.579    | -0.007  | 0.002   | 1.40E-05 |          |
| Railway Lden      | cg25201280 | 15        | 35838552     | <i>ATPBD4</i>   | TSS200  | -0.001  | 0.0002   | 1.78E-07 | 0.077   | -0.001  | 0.0002   | 2.07E-07 |
|                   | cg24653263 | 5         | 38258335     | <i>EGFLAM</i>   | TSS200  | -0.003  | 0.001    | 1.24E-06 | 0.233   | -0.003  | 0.001    | 1.42E-06 |
|                   | cg16825060 | 8         | 144242342    | <i>LY6H</i>     | TSS1500 | -0.003  | 0.001    | 2.45E-06 | 0.233   | -0.003  | 0.001    | 2.72E-06 |
|                   | cg23468045 | 5         | 12669584     | <i>N.A</i>      | N.A.    | 0.001   | 0.0002   | 2.46E-06 | 0.233   | 0.001   | 0.0002   | 2.25E-06 |
|                   | cg07461273 | 7         | 99697172     | <i>MCM7</i>     | Body    | -0.004  | 0.001    | 2.71E-06 | 0.233   | -0.004  | 0.001    | 2.73E-06 |
|                   | cg01301319 | 7         | 27153580     | <i>HOXA3</i>    | 5UTR    | -0.003  | 0.001    | 4.42E-06 | 0.261   | -0.003  | 0.001    | 4.29E-06 |
|                   | cg19270309 | 17        | 77712853     | <i>ENPP7</i>    | 3UTR    | 0.002   | 0.0005   | 4.48E-06 | 0.261   | 0.002   | 0.0005   | 4.85E-06 |
|                   | cg13402217 | 1         | 151584375    | <i>SNX27</i>    | TSS1500 | -0.003  | 0.001    | 5.26E-06 | 0.261   | -0.003  | 0.001    | 4.63E-06 |
|                   | cg18076500 | 19        | 11640020     | <i>ECSIT</i>    | TSS200  | -0.001  | 0.0001   | 6.44E-06 | 0.261   | -0.001  | 0.0001   | 6.16E-06 |
| cg20497635        | 17         | 998504    | <i>ABR</i>   | Body            | 0.004   | 0.001   | 6.90E-06 | 0.261    | 0.004   | 0.001   | 8.21E-06 |          |
| Road traffic Lden | cg01836943 | 12        | 23267824     | <i>N.A</i>      | N.A.    | 0.001   | 0.0002   | 8.50E-07 | 0.366   | 0.001   | 0.0002   | 1.09E-06 |
|                   | cg14328230 | 19        | 17830207     | <i>MAP1S</i>    | TSS200  | -0.0003 | 0.0001   | 4.65E-06 | 0.492   | -0.0003 | 0.0001   | 6.51E-06 |
|                   | cg01066220 | 6         | 31696240     | <i>DDAH2</i>    | Body    | 0.0005  | 0.0001   | 5.40E-06 | 0.492   | 0.0005  | 0.0001   | 7.15E-06 |
|                   | cg09129334 | 13        | 111837676    | <i>ARHGEF7</i>  | Body    | -0.007  | 0.001    | 7.12E-06 | 0.492   | -0.007  | 0.001    | 8.81E-06 |
|                   | cg17765713 | 4         | 128801754    | <i>PLK4</i>     | TSS1500 | -0.001  | 0.0003   | 1.07E-05 | 0.492   | -0.002  | 0.0003   | 7.97E-06 |
|                   | cg22530293 | 1         | 2458418      | <i>PANK4</i>    | TSS1500 | -0.001  | 0.0002   | 1.22E-05 | 0.492   | -0.001  | 0.0002   | 1.42E-05 |
|                   | cg14748795 | 10        | 101283090    |                 |         | -0.005  | 0.001    | 1.25E-05 | 0.492   | -0.005  | 0.001    | 1.41E-05 |

|                   |            |    |           |                  |         |         |        |                       |       |         |        |          |
|-------------------|------------|----|-----------|------------------|---------|---------|--------|-----------------------|-------|---------|--------|----------|
|                   | cg10447111 | 12 | 4647897   | <i>RAD51API</i>  | TSS200  | -0.001  | 0.0003 | 1.55E-05              | 0.492 | -0.001  | 0.0003 | 1.01E-05 |
|                   | cg07929259 | 14 | 38031240  | <i>N.A</i>       | N.A.    | 0.001   | 0.0002 | 1.67E-05              | 0.492 | 0.001   | 0.0002 | 2.19E-05 |
|                   | cg06646021 | 1  | 229406520 | <i>RAB4A</i>     | TSS1500 | -0.004  | 0.001  | 1.91E-05              | 0.492 | -0.004  | 0.001  | 2.08E-05 |
| NO <sub>2</sub>   | cg04337651 | 2  | 239344738 | <i>ASBI</i>      | Body    | 0.003   | 0.001  | 1.08E-06              | 0.421 | 0.003   | 0.001  | 1.78E-06 |
|                   | cg01493658 | 9  | 133588893 | <i>ABLI</i>      | TSS1500 | -0.0004 | 0.0001 | 2.08E-06              | 0.421 | -0.0004 | 0.0001 | 2.50E-06 |
|                   | cg06826760 | 1  | 193076307 | <i>GLRX2</i>     | TSS1500 | 0.005   | 0.001  | 3.05E-06              | 0.421 | 0.005   | 0.001  | 3.46E-06 |
|                   | cg26814835 | 20 | 30195969  | <i>N.A</i>       | N.A.    | 0.001   | 0.0003 | 4.66E-06              | 0.421 | 0.001   | 0.0003 | 4.47E-06 |
|                   | cg18601596 | 6  | 39283313  | <i>KCNK16</i>    | Body    | 0.005   | 0.001  | 4.89E-06              | 0.421 | 0.005   | 0.001  | 5.71E-06 |
|                   | cg18809706 | 7  | 143209945 | <i>N.A</i>       | N.A.    | 0.001   | 0.0002 | 6.62E-06              | 0.452 | 0.001   | 0.0002 | 4.32E-06 |
|                   | cg10145926 | 14 | 95875792  | <i>C14orf139</i> | Body    | 0.002   | 0.0005 | 7.35E-06              | 0.452 | 0.0022  | 0.0005 | 7.49E-06 |
|                   | cg11844697 | 17 | 80935769  | <i>B3GNTL1</i>   | Body    | 0.0004  | 0.0001 | 9.08E-06              | 0.471 | 0.0004  | 0.0001 | 1.46E-05 |
|                   | cg18156543 | 17 | 48172978  | <i>PDK2</i>      | Body    | -0.001  | 0.0003 | 9.85E-06              | 0.471 | -0.001  | 0.0003 | 1.77E-05 |
|                   | cg11856476 | 12 | 77064229  | <i>N.A</i>       | N.A.    | 0.001   | 0.0002 | 1.48E-05              | 0.556 | 0.0008  | 0.0002 | 1.35E-05 |
| PM <sub>2.5</sub> | cg26704043 | 6  | 5282702   | <i>FARS2</i>     | 5UTR    | 0.014   | 0.003  | 9.21E-08 <sup>a</sup> | 0.040 | 0.013   | 0.003  | 1.66E-07 |
|                   | cg20099458 | 7  | 5272275   | <i>WIPI2</i>     | 3UTR    | 0.014   | 0.003  | 5.08E-07              | 0.109 | 0.014   | 0.003  | 5.30E-07 |
|                   | cg25029903 | 2  | 44105057  | <i>ABCG8</i>     | 3UTR    | 0.017   | 0.004  | 8.22E-07              | 0.118 | 0.017   | 0.004  | 1.28E-06 |
|                   | cg25162533 | 17 | 81032067  | <i>N.A</i>       | N.A.    | 0.019   | 0.004  | 1.15E-06              | 0.124 | 0.020   | 0.004  | 4.73E-07 |
|                   | cg14531665 | 9  | 91058614  | <i>SPIN1</i>     | Body    | 0.011   | 0.002  | 2.00E-06              | 0.133 | 0.011   | 0.002  | 2.89E-06 |
|                   | cg20703242 | 1  | 230279135 | <i>GALNT2</i>    | Body    | 0.014   | 0.003  | 2.86E-06              | 0.133 | 0.014   | 0.003  | 3.56E-06 |
|                   | cg00486143 | 7  | 127774154 | <i>N.A</i>       | N.A.    | 0.011   | 0.002  | 2.95E-06              | 0.133 | 0.011   | 0.002  | 3.12E-06 |
|                   | cg02194396 | 19 | 427162    | <i>SHC2</i>      | Body    | 0.017   | 0.004  | 2.95E-06              | 0.133 | 0.017   | 0.004  | 3.67E-06 |
|                   | cg02740308 | 2  | 132414348 | <i>N.A</i>       | N.A.    | 0.020   | 0.004  | 3.31E-06              | 0.133 | 0.020   | 0.004  | 3.31E-06 |
|                   | cg17112266 | 7  | 150737198 | <i>ABCB8</i>     | Body    | 0.009   | 0.002  | 3.50E-06              | 0.133 | 0.009   | 0.002  | 4.18E-06 |

CpG: Cytosine-phosphate-Guanine. SAPALDIA: Swiss cohort study on air pollution and lung and heart diseases in adults. CHR: chromosome. SE: standard error. FDR: false discovery rate. Lden: day-evening-night noise level. NO<sub>2</sub>: nitrogen dioxide. PM<sub>2.5</sub>: particulate matter with aerodynamic diameter <2.5 μm. Beta coefficients represent increase or decrease in DNA methylation per 10dB increase in aircraft, railway or road traffic Lden or 10 μg/m<sup>3</sup> increase in NO<sub>2</sub> or PM<sub>2.5</sub>. All estimates were from single exposure epigenome-wide linear mixed-effects models, with random intercept at the level of participant. In a preliminary step, DNA methylation β-values were regressed on the Illumina control probe-derived first 30 principal components to correct for correlation structures and technical bias, and residuals of these regressions covering 430,477 CpGs were used as the technical bias-corrected methylation level at the CpG sites. Extreme values of the residuals (lying beyond three times the interquartile range below the first quartile and above the third quartile at each CpG site) were replaced with their corresponding detection threshold value (“modified winsorization”). The “winsorized” data were then used as the dependent variables in the epigenome-wide association study. N.A.: not annotated. <sup>a</sup> Significant at Bonferroni-corrected p-value of 1.16E-07. Model 1: adjusted for age, sex, educational level, area, and neighborhood socio-economic status, greenness index, smoking status and pack years, exposure to passive smoke, consumption of fruits, vegetables and alcohol, nested study, asthma status, survey, source-specific noise truncation indicator (for Lden models) and leukocyte composition. Model 2: Model 1 + body mass index and physical activity.

Table S4. Top ten CpGs independently associated with source-specific transportation noise and air pollution in the multi-exposure model, stratified by nested study.

| Exposure          | CpG ID     | CHR | Location  | Gene            | All    |        |          |         | ALEC   |        |          | EXPOs<br>OMICS |        |          |
|-------------------|------------|-----|-----------|-----------------|--------|--------|----------|---------|--------|--------|----------|----------------|--------|----------|
|                   |            |     |           |                 | Beta   | SE     | P-value  | P (FDR) | Beta   | SE     | P-value  | Beta           | SE     | P-value  |
| Aircraft Lden     | cg02286155 | 5   | 176826262 | <i>N.A.</i>     | -0.007 | 0.001  | 1.48E-06 | 0.637   | -0.006 | 0.002  | 1.65E-04 | -0.008         | 0.003  | 9.11E-03 |
|                   | cg15063530 | 2   | 17716941  | <i>N.A.</i>     | -0.009 | 0.002  | 8.14E-06 | 0.659   | -0.012 | 0.002  | 3.38E-07 | -0.001         | 0.004  | 7.44E-01 |
|                   | cg16218477 | 7   | 1066167   | <i>C7orf50</i>  | -0.004 | 0.001  | 8.53E-06 | 0.659   | -0.004 | 0.001  | 1.03E-04 | -0.004         | 0.002  | 7.11E-02 |
|                   | cg21602842 | 18  | 46291908  | <i>KIAA0427</i> | -0.005 | 0.001  | 9.84E-06 | 0.659   | -0.004 | 0.001  | 1.48E-03 | -0.008         | 0.002  | 1.14E-03 |
|                   | cg09042449 | 10  | 44064225  | <i>ZNF239</i>   | -0.002 | 0.0004 | 1.06E-05 | 0.659   | -0.002 | 0.0005 | 2.88E-04 | -0.002         | 0.001  | 2.02E-02 |
|                   | cg10975000 | 13  | 28371375  | <i>N.A.</i>     | -0.002 | 0.0005 | 1.12E-05 | 0.659   | -0.003 | 0.001  | 4.58E-06 | -0.001         | 0.001  | 2.79E-01 |
|                   | cg06220958 | 17  | 10452851  | <i>MYH2</i>     | 0.011  | 0.002  | 1.24E-05 | 0.659   | 0.010  | 0.003  | 1.64E-04 | 0.011          | 0.005  | 3.72E-02 |
|                   | cg25462190 | 5   | 177547067 | <i>N4BP3</i>    | -0.007 | 0.002  | 1.32E-05 | 0.659   | -0.005 | 0.002  | 9.91E-04 | -0.009         | 0.004  | 1.19E-02 |
|                   | cg11944797 | 13  | 99135711  | <i>STK24</i>    | -0.001 | 0.0003 | 1.38E-05 | 0.659   | -0.001 | 0.0003 | 1.86E-02 | -0.003         | 0.001  | 1.12E-04 |
|                   | cg04635504 | 11  | 2829241   | <i>KCNQ1</i>    | -0.005 | 0.001  | 1.61E-05 | 0.664   | -0.006 | 0.001  | 9.97E-06 | -0.003         | 0.003  | 3.31E-01 |
| Railway Lden      | cg25201280 | 15  | 35838552  | <i>ATPBD4</i>   | -0.001 | 0.0002 | 1.74E-07 | 0.075   | -0.001 | 0.0002 | 1.39E-05 | -0.001         | 0.0003 | 1.60E-03 |
|                   | cg24653263 | 5   | 38258335  | <i>EGFLAM</i>   | -0.003 | 0.001  | 8.97E-07 | 0.193   | -0.003 | 0.001  | 8.98E-05 | -0.005         | 0.002  | 1.63E-03 |
|                   | cg16825060 | 8   | 144242342 | <i>LY6H</i>     | -0.003 | 0.001  | 2.34E-06 | 0.256   | -0.003 | 0.001  | 6.62E-05 | -0.003         | 0.001  | 3.24E-02 |
|                   | cg23468045 | 5   | 12669584  | <i>N.A.</i>     | 0.001  | 0.0002 | 2.37E-06 | 0.256   | 0.001  | 0.0003 | 1.99E-04 | 0.002          | 0.001  | 9.36E-03 |
|                   | cg19270309 | 17  | 77712853  | <i>ENPP7</i>    | 0.002  | 0.0005 | 3.25E-06 | 0.266   | 0.002  | 0.001  | 4.87E-05 | 0.002          | 0.001  | 1.40E-02 |
|                   | cg07461273 | 7   | 99697172  | <i>MCM7</i>     | -0.004 | 0.001  | 3.78E-06 | 0.266   | -0.003 | 0.001  | 1.21E-03 | -0.006         | 0.002  | 6.75E-04 |
|                   | cg01301319 | 7   | 27153580  | <i>HOXA3</i>    | -0.003 | 0.001  | 4.60E-06 | 0.266   | -0.002 | 0.001  | 5.57E-04 | -0.005         | 0.001  | 1.43E-03 |
|                   | cg23113715 | 22  | 25800663  | <i>N.A.</i>     | -0.004 | 0.001  | 5.79E-06 | 0.266   | -0.005 | 0.001  | 6.26E-06 | -0.003         | 0.002  | 1.24E-01 |
|                   | cg13402217 | 1   | 151584375 | <i>SNX27</i>    | -0.003 | 0.001  | 6.03E-06 | 0.266   | -0.002 | 0.001  | 9.42E-04 | -0.005         | 0.002  | 3.95E-03 |
|                   | cg24047259 | 14  | 65347275  | <i>N.A.</i>     | -0.001 | 0.0003 | 7.35E-06 | 0.266   | -0.001 | 0.0003 | 4.26E-04 | -0.002         | 0.001  | 1.36E-02 |
| Road traffic Lden | cg09129334 | 13  | 111837676 | <i>ARHGEF7</i>  | -0.007 | 0.001  | 1.73E-06 | 0.384   | -0.007 | 0.002  | 2.39E-05 | -0.007         | 0.004  | 4.62E-02 |
|                   | cg17383236 | 7   | 100167504 | <i>N.A.</i>     | -0.002 | 0.0005 | 2.76E-06 | 0.384   | -0.002 | 0.001  | 3.24E-04 | -0.003         | 0.001  | 1.97E-02 |
|                   | cg01066220 | 6   | 31696240  | <i>DDAH2</i>    | 0.001  | 0.0001 | 3.48E-06 | 0.384   | 0.0005 | 0.0001 | 7.43E-05 | 0.001          | 0.0003 | 1.95E-02 |
|                   | cg23910243 | 16  | 31484618  | <i>TGFB111</i>  | -0.002 | 0.0005 | 4.32E-06 | 0.384   | -0.002 | 0.001  | 7.61E-05 | -0.002         | 0.001  | 2.27E-02 |
|                   | cg06646021 | 1   | 229406520 | <i>RAB4A</i>    | -0.005 | 0.001  | 4.47E-06 | 0.384   | -0.005 | 0.001  | 7.03E-06 | -0.002         | 0.002  | 2.88E-01 |

|                   |            |    |           |                 |         |        |          |       |         |        |          |         |        |          |
|-------------------|------------|----|-----------|-----------------|---------|--------|----------|-------|---------|--------|----------|---------|--------|----------|
|                   | cg03066594 | 20 | 10415919  | <i>C20orf94</i> | 0.0005  | 0.0001 | 6.00E-06 | 0.386 | 0.0005  | 0.0001 | 2.97E-06 | 0.0002  | 0.0002 | 2.86E-01 |
|                   | cg03966094 | 22 | 21058792  | <i>TMEM191A</i> | -0.003  | 0.001  | 7.06E-06 | 0.386 | -0.002  | 0.001  | 1.18E-03 | -0.005  | 0.001  | 6.86E-04 |
|                   | cg13948857 | 5  | 131763756 | <i>C5orf56</i>  | -0.003  | 0.001  | 7.17E-06 | 0.386 | -0.002  | 0.001  | 3.33E-03 | -0.005  | 0.002  | 7.71E-03 |
|                   | cg08351004 | 2  | 172965650 | <i>DLX2</i>     | -0.002  | 0.0005 | 9.53E-06 | 0.456 | -0.002  | 0.001  | 9.02E-05 | -0.002  | 0.001  | 3.34E-02 |
|                   | cg13777730 | 1  | 234793300 | <i>N.A.</i>     | -0.003  | 0.001  | 1.07E-05 | 0.458 | -0.002  | 0.001  | 3.56E-03 | -0.006  | 0.002  | 1.87E-03 |
| NO <sub>2</sub>   | cg04337651 | 2  | 239344738 | <i>ASB1</i>     | 0.004   | 0.001  | 2.06E-06 | 0.657 | 0.003   | 0.001  | 1.28E-04 | 0.005   | 0.002  | 8.00E-03 |
|                   | cg18776472 | 10 | 50732819  | <i>ERCC6</i>    | -0.001  | 0.0002 | 8.20E-06 | 0.657 | -0.0004 | 0.0001 | 1.20E-02 | -0.002  | 0.001  | 1.16E-04 |
|                   | cg18601596 | 6  | 39283313  | <i>KCNK16</i>   | 0.006   | 0.001  | 8.21E-06 | 0.657 | 0.004   | 0.001  | 1.73E-03 | 0.012   | 0.003  | 1.00E-04 |
|                   | cg12392998 | 17 | 79550668  | <i>NPLOC4</i>   | -0.002  | 0.0004 | 8.72E-06 | 0.657 | -0.002  | 0.0005 | 3.46E-05 | -0.001  | 0.001  | 1.21E-01 |
|                   | cg16550606 | 13 | 50160670  | <i>RCBTB1</i>   | 0.004   | 0.001  | 1.33E-05 | 0.657 | 0.005   | 0.001  | 5.39E-06 | 0.0004  | 0.002  | 8.53E-01 |
|                   | cg25266109 | 19 | 12404608  | <i>ZNF44</i>    | -0.0004 | 0.0001 | 1.38E-05 | 0.657 | -0.0004 | 0.0001 | 2.90E-04 | -0.0004 | 0.0002 | 7.85E-02 |
|                   | cg01746514 | 14 | 24520922  | <i>LRRC16B</i>  | -0.001  | 0.0002 | 1.43E-05 | 0.657 | -0.001  | 0.0003 | 9.85E-05 | -0.001  | 0.0005 | 4.20E-02 |
|                   | cg15811902 | 15 | 75918385  | <i>SNUPN</i>    | -0.002  | 0.0005 | 1.61E-05 | 0.657 | -0.003  | 0.001  | 7.41E-06 | -0.001  | 0.001  | 3.74E-01 |
|                   | cg26898336 | 17 | 15244519  | <i>TEKT3</i>    | 0.002   | 0.0005 | 1.65E-05 | 0.657 | 0.002   | 0.001  | 8.41E-04 | 0.004   | 0.001  | 3.09E-03 |
|                   | cg21099332 | 5  | 39270715  | <i>N.A.</i>     | 0.004   | 0.001  | 1.66E-05 | 0.657 | 0.004   | 0.001  | 3.11E-05 | 0.003   | 0.002  | 2.52E-01 |
| PM <sub>2.5</sub> | cg26704043 | 6  | 5282702   | <i>FARS2</i>    | 0.014   | 0.003  | 4.18E-07 | 0.180 | 0.009   | 0.003  | 1.98E-03 | 0.023   | 0.007  | 7.68E-04 |
|                   | cg05157625 | 14 | 93153553  | <i>RIN3</i>     | 0.021   | 0.004  | 1.08E-06 | 0.231 | 0.020   | 0.005  | 2.00E-05 | 0.024   | 0.012  | 4.59E-02 |
|                   | cg20099458 | 7  | 5272275   | <i>WIPI2</i>    | 0.014   | 0.003  | 1.61E-06 | 0.231 | 0.010   | 0.003  | 1.41E-03 | 0.026   | 0.007  | 3.56E-04 |
|                   | cg06587257 | 12 | 50452135  | <i>ACCN2</i>    | 0.022   | 0.005  | 2.71E-06 | 0.292 | 0.018   | 0.005  | 8.16E-04 | 0.043   | 0.011  | 5.78E-05 |
|                   | cg14531665 | 9  | 91058614  | <i>SPINI</i>    | 0.012   | 0.003  | 5.91E-06 | 0.398 | 0.009   | 0.003  | 2.72E-04 | 0.010   | 0.007  | 1.64E-01 |
|                   | cg06526020 | 6  | 34308880  | <i>NUDT3</i>    | 0.029   | 0.006  | 6.43E-06 | 0.398 | 0.022   | 0.007  | 1.25E-03 | 0.035   | 0.016  | 3.01E-02 |
|                   | cg21058520 | 6  | 100914733 | <i>N.A.</i>     | 0.004   | 0.001  | 6.76E-06 | 0.398 | 0.002   | 0.001  | 8.41E-02 | 0.010   | 0.002  | 5.09E-06 |
|                   | cg16259904 | 10 | 134146220 | <i>LRRC27</i>   | 0.027   | 0.006  | 8.90E-06 | 0.398 | 0.023   | 0.007  | 4.20E-04 | 0.024   | 0.015  | 9.98E-02 |
|                   | cg12770741 | 17 | 883776    | <i>NXN</i>      | 0.018   | 0.004  | 9.15E-06 | 0.398 | 0.020   | 0.005  | 8.90E-06 | 0.005   | 0.009  | 6.17E-01 |
|                   | cg26750893 | 2  | 38043481  | <i>N.A.</i>     | 0.016   | 0.004  | 1.05E-05 | 0.398 | 0.017   | 0.004  | 8.33E-06 | 0.007   | 0.010  | 4.57E-01 |

CpG: Cytosine-phosphate-Guanine. ALEC: Aging lungs in European cohorts. CHR: chromosome. SE: standard error. FDR: false discovery rate. Lden: day-evening-night noise level. NO<sub>2</sub>: nitrogen dioxide. PM<sub>2.5</sub>: particulate matter with aerodynamic diameter <2.5 μm. Beta coefficients represent increase or decrease in DNA methylation per 10 dB increase in aircraft, railway or road traffic Lden or 10 μg/m<sup>3</sup> increase in NO<sub>2</sub> or PM<sub>2.5</sub>. All estimates were from multi-exposure epigenome-wide mixed linear models, with random intercept at the level of participant, adjusted for age, sex, educational level, area, neighborhood socio-economic status, greenness index, smoking status, smoking pack years, exposure to passive smoke, consumption of fruits, vegetables and alcohol, asthma status, survey, noise truncation indicators and leukocyte composition. Multi-exposure models included all five exposures (Aircraft, railway, road traffic Lden, NO<sub>2</sub> and PM<sub>2.5</sub>) at the same time. In a preliminary step, DNA methylation β-values were regressed on the Illumina control probe-derived first 30 principal components to correct for correlation structures and technical bias, and residuals of these regressions covering 430,477 CpGs were used as the technical bias-corrected methylation level at the CpG sites. Extreme values of the residuals (lying beyond three times the interquartile range below the first quartile and above the third quartile at each CpG site) were replaced with their corresponding detection threshold value ("modified



winsorization”). The “winsorized” data were then used as the dependent variables in the epigenome-wide association study. N (all) = 1,389 (2542 observations). N (ALEC) = 985 (1942 observations). N (EXPOsOMICS) = 404 (600 observations). ALEC and EXPOsOMICS are European cohort consortia in which SAPALDIA participates. *N.A.*: not annotated.

Table S5. Sensitivity of source-specific transportation noise and air pollution-related CpGs to nighttime window-opening behavior of participants

| Exposure          | CpG ID     | CHR      | Location     | Gene            | Main model; all |          |          |         | Main model; regular open windows |          |          |
|-------------------|------------|----------|--------------|-----------------|-----------------|----------|----------|---------|----------------------------------|----------|----------|
|                   |            |          |              |                 | Beta            | SE       | P-value  | P (FDR) | Beta                             | SE       | P-value  |
| Aircraft Lden     | cg02286155 | 5        | 176826262    | <i>N.A.</i>     | -0.007          | 0.001    | 1.48E-06 | 0.637   | -0.008                           | 0.002    | 1.30E-06 |
|                   | cg15063530 | 2        | 17716941     | <i>N.A.</i>     | -0.009          | 0.002    | 8.14E-06 | 0.659   | -0.009                           | 0.002    | 4.76E-05 |
|                   | cg16218477 | 7        | 1066167      | <i>C7orf50</i>  | -0.004          | 0.001    | 8.53E-06 | 0.659   | -0.004                           | 0.001    | 7.82E-05 |
|                   | cg21602842 | 18       | 46291908     | <i>KIAA0427</i> | -0.005          | 0.001    | 9.84E-06 | 0.659   | -0.005                           | 0.001    | 1.07E-04 |
|                   | cg09042449 | 10       | 44064225     | <i>ZNF239</i>   | -0.002          | 0.0004   | 1.06E-05 | 0.659   | -0.002                           | 0.0004   | 3.69E-05 |
|                   | cg10975000 | 13       | 28371375     | <i>N.A.</i>     | -0.002          | 0.0005   | 1.12E-05 | 0.659   | -0.002                           | 0.001    | 9.62E-05 |
|                   | cg06220958 | 17       | 10452851     | <i>MYH2</i>     | 0.011           | 0.002    | 1.24E-05 | 0.659   | 0.012                            | 0.003    | 9.60E-06 |
|                   | cg25462190 | 5        | 177547067    | <i>N4BP3</i>    | -0.007          | 0.002    | 1.32E-05 | 0.659   | -0.006                           | 0.002    | 9.72E-04 |
|                   | cg11944797 | 13       | 99135711     | <i>STK24</i>    | -0.001          | 0.0003   | 1.38E-05 | 0.659   | -0.002                           | 0.0004   | 1.12E-05 |
| cg04635504        | 11         | 2829241  | <i>KCNQ1</i> | -0.005          | 0.001           | 1.61E-05 | 0.664    | -0.005  | 0.001                            | 1.05E-04 |          |
| Railway Lden      | cg25201280 | 15       | 35838552     | <i>ATPBD4</i>   | -0.001          | 0.0002   | 1.74E-07 | 0.075   | -0.001                           | 0.0002   | 8.85E-07 |
|                   | cg24653263 | 5        | 38258335     | <i>EGFLAM</i>   | -0.003          | 0.001    | 8.97E-07 | 0.193   | -0.004                           | 0.001    | 2.62E-06 |
|                   | cg16825060 | 8        | 144242342    | <i>LY6H</i>     | -0.003          | 0.001    | 2.34E-06 | 0.256   | -0.003                           | 0.001    | 9.78E-07 |
|                   | cg23468045 | 5        | 12669584     | <i>N.A.</i>     | 0.001           | 0.0002   | 2.37E-06 | 0.256   | 0.001                            | 0.0003   | 7.97E-05 |
|                   | cg19270309 | 17       | 77712853     | <i>ENPP7</i>    | 0.002           | 0.0005   | 3.25E-06 | 0.266   | 0.002                            | 0.0005   | 4.41E-04 |
|                   | cg07461273 | 7        | 99697172     | <i>MCM7</i>     | -0.004          | 0.001    | 3.78E-06 | 0.266   | -0.004                           | 0.001    | 2.29E-05 |
|                   | cg01301319 | 7        | 27153580     | <i>HOXA3</i>    | -0.003          | 0.001    | 4.60E-06 | 0.266   | -0.003                           | 0.001    | 1.95E-04 |
|                   | cg23113715 | 22       | 25800663     | <i>N.A.</i>     | -0.004          | 0.001    | 5.79E-06 | 0.266   | -0.005                           | 0.001    | 5.72E-06 |
|                   | cg13402217 | 1        | 151584375    | <i>SNX27</i>    | -0.003          | 0.001    | 6.03E-06 | 0.266   | -0.003                           | 0.001    | 2.82E-06 |
| cg24047259        | 14         | 65347275 | <i>N.A.</i>  | -0.001          | 0.0003          | 7.35E-06 | 0.266    | -0.001  | 0.0003                           | 2.55E-06 |          |
| Road traffic Lden | cg09129334 | 13       | 111837676    | <i>ARHGEF7</i>  | -0.007          | 0.001    | 1.73E-06 | 0.384   | -0.008                           | 0.002    | 1.35E-05 |
|                   | cg17383236 | 7        | 100167504    | <i>N.A.</i>     | -0.002          | 0.0005   | 2.76E-06 | 0.384   | -0.002                           | 0.001    | 1.26E-03 |
|                   | cg01066220 | 6        | 31696240     | <i>DDAH2</i>    | 0.001           | 0.0001   | 3.48E-06 | 0.384   | 0.0004                           | 0.0001   | 9.77E-04 |
|                   | cg23910243 | 16       | 31484618     | <i>TGFB111</i>  | -0.002          | 0.0005   | 4.32E-06 | 0.384   | -0.002                           | 0.0005   | 3.61E-06 |

|                   |            |    |           |                 |         |        |          |       |         |        |          |
|-------------------|------------|----|-----------|-----------------|---------|--------|----------|-------|---------|--------|----------|
|                   | cg06646021 | 1  | 229406520 | <i>RAB4A</i>    | -0.005  | 0.001  | 4.47E-06 | 0.384 | -0.005  | 0.001  | 1.57E-05 |
|                   | cg03066594 | 20 | 10415919  | <i>C20orf94</i> | 0.0005  | 0.0001 | 6.00E-06 | 0.386 | 0.0005  | 0.0001 | 5.26E-05 |
|                   | cg03966094 | 22 | 21058792  | <i>TMEM191A</i> | -0.003  | 0.001  | 7.06E-06 | 0.386 | -0.003  | 0.001  | 1.34E-05 |
|                   | cg13948857 | 5  | 131763756 | <i>C5orf56</i>  | -0.003  | 0.001  | 7.17E-06 | 0.386 | -0.003  | 0.001  | 1.96E-04 |
|                   | cg08351004 | 2  | 172965650 | <i>DLX2</i>     | -0.002  | 0.0005 | 9.53E-06 | 0.456 | -0.003  | 0.0005 | 1.60E-06 |
|                   | cg13777730 | 1  | 234793300 | <i>N.A.</i>     | -0.003  | 0.001  | 1.07E-05 | 0.458 | -0.003  | 0.001  | 3.88E-05 |
| NO <sub>2</sub>   | cg04337651 | 2  | 239344738 | <i>ASB1</i>     | 0.004   | 0.001  | 2.06E-06 | 0.657 | 0.003   | 0.001  | 5.08E-05 |
|                   | cg18776472 | 10 | 50732819  | <i>ERCC6</i>    | -0.001  | 0.0002 | 8.20E-06 | 0.657 | -0.001  | 0.0002 | 1.08E-04 |
|                   | cg18601596 | 6  | 39283313  | <i>KCNK16</i>   | 0.006   | 0.001  | 8.21E-06 | 0.657 | 0.006   | 0.002  | 4.05E-05 |
|                   | cg12392998 | 17 | 79550668  | <i>NPLOC4</i>   | -0.002  | 0.0004 | 8.72E-06 | 0.657 | -0.002  | 0.0005 | 1.07E-05 |
|                   | cg16550606 | 13 | 50160670  | <i>RCBTB1</i>   | 0.004   | 0.001  | 1.33E-05 | 0.657 | 0.004   | 0.001  | 4.67E-05 |
|                   | cg25266109 | 19 | 12404608  | <i>ZNF44</i>    | -0.0004 | 0.0001 | 1.38E-05 | 0.657 | -0.0005 | 0.0001 | 5.83E-05 |
|                   | cg01746514 | 14 | 24520922  | <i>LRRC16B</i>  | -0.001  | 0.0002 | 1.43E-05 | 0.657 | -0.001  | 0.0003 | 5.17E-07 |
|                   | cg15811902 | 15 | 75918385  | <i>SNUPN</i>    | -0.002  | 0.0005 | 1.61E-05 | 0.657 | -0.002  | 0.001  | 2.55E-05 |
|                   | cg26898336 | 17 | 15244519  | <i>TEKT3</i>    | 0.002   | 0.0005 | 1.65E-05 | 0.657 | 0.003   | 0.001  | 2.36E-06 |
|                   | cg21099332 | 5  | 39270715  | <i>N.A.</i>     | 0.004   | 0.001  | 1.66E-05 | 0.657 | 0.005   | 0.001  | 3.90E-06 |
| PM <sub>2.5</sub> | cg26704043 | 6  | 5282702   | <i>FARS2</i>    | 0.014   | 0.003  | 4.18E-07 | 0.180 | 0.014   | 0.003  | 1.28E-05 |
|                   | cg05157625 | 14 | 93153553  | <i>RIN3</i>     | 0.021   | 0.004  | 1.08E-06 | 0.231 | 0.022   | 0.005  | 2.00E-05 |
|                   | cg20099458 | 7  | 5272275   | <i>WIPI2</i>    | 0.014   | 0.003  | 1.61E-06 | 0.231 | 0.014   | 0.003  | 4.66E-05 |
|                   | cg06587257 | 12 | 50452135  | <i>ACCN2</i>    | 0.022   | 0.005  | 2.71E-06 | 0.292 | 0.024   | 0.006  | 2.48E-05 |
|                   | cg14531665 | 9  | 91058614  | <i>SPIN1</i>    | 0.012   | 0.003  | 5.91E-06 | 0.398 | 0.013   | 0.003  | 7.31E-06 |
|                   | cg06526020 | 6  | 34308880  | <i>NUDT3</i>    | 0.029   | 0.006  | 6.43E-06 | 0.398 | 0.031   | 0.007  | 3.07E-05 |
|                   | cg21058520 | 6  | 100914733 | <i>N.A.</i>     | 0.004   | 0.001  | 6.76E-06 | 0.398 | 0.004   | 0.001  | 7.15E-05 |
|                   | cg16259904 | 10 | 134146220 | <i>LRRC27</i>   | 0.027   | 0.006  | 8.90E-06 | 0.398 | 0.026   | 0.007  | 1.95E-04 |
|                   | cg12770741 | 17 | 883776    | <i>NXN</i>      | 0.018   | 0.004  | 9.15E-06 | 0.398 | 0.015   | 0.005  | 9.64E-04 |
|                   | cg26750893 | 2  | 38043481  | <i>N.A.</i>     | 0.016   | 0.004  | 1.05E-05 | 0.398 | 0.018   | 0.004  | 5.28E-05 |

CpG: Cytosine-phosphate-Guanine. CHR: chromosome. SE: standard error. FDR: false discovery rate. Lden: day-evening-night noise level. NO<sub>2</sub>: nitrogen dioxide. PM<sub>2.5</sub>: particulate matter with aerodynamic diameter <2.5 μm. Beta coefficients represent increase or decrease in DNA methylation per 10 dB increase in aircraft, railway or road traffic Lden or 10 μg/m<sup>3</sup> increase in NO<sub>2</sub> or PM<sub>2.5</sub>. All estimates were from multi-exposure linear mixed-effects models (containing all exposures), with participant-level random intercept, adjusted for age, sex, education, area, neighborhood socio-economic status, greenness index, smoking status, pack years, passive smoke, consumption of fruits, vegetables and alcohol, asthma status, survey and leukocyte composition. In a preliminary step, DNA methylation β-values were regressed on the Illumina control probe-derived first 30 principal components to correct for correlation structures and technical bias, and residuals of these regressions covering 430,477 CpGs were used as the technical bias-corrected methylation level at the CpG sites. Extreme values of the residuals (lying beyond three times the interquartile range

below the first quartile and above the third quartile at each CpG site) were replaced with their corresponding detection threshold value (“modified winsorization”). The “winsorized” data were then used as the dependent variables in the epigenome-wide association study. N (all) = 1,389 (2,542 observations); N (nighttime regular open windows) = 1,150 (2,517 observations). *N.A.*: not annotated.

Table S6. Sensitivity of source-specific transportation noise and air pollution-related CpGs to “non-winsorization” of extreme methylation values

| Exposure          | CpG ID     | CHR | Location  | Gene            | Main model |        |          |         | “Non-winsorized” model |        |          |        |
|-------------------|------------|-----|-----------|-----------------|------------|--------|----------|---------|------------------------|--------|----------|--------|
|                   |            |     |           |                 | Beta       | SE     | P-value  | P (FDR) | Beta                   | SE     | P-value  | N (EV) |
| Aircraft Lden     | cg02286155 | 5   | 176826262 | <i>N.A.</i>     | -0.007     | 0.001  | 1.48E-06 | 0.637   | -0.007                 | 0.002  | 2.87E-06 | 4      |
|                   | cg15063530 | 2   | 17716941  | <i>N.A.</i>     | -0.009     | 0.002  | 8.14E-06 | 0.659   | -0.010                 | 0.002  | 9.20E-06 | 32     |
|                   | cg16218477 | 7   | 1066167   | <i>C7orf50</i>  | -0.004     | 0.001  | 8.53E-06 | 0.659   | -0.004                 | 0.001  | 1.18E-05 | 2      |
|                   | cg21602842 | 18  | 46291908  | <i>KIAA0427</i> | -0.005     | 0.001  | 9.84E-06 | 0.659   | -0.005                 | 0.001  | 9.84E-06 | 1      |
|                   | cg09042449 | 10  | 44064225  | <i>ZNF239</i>   | -0.002     | 0.0004 | 1.06E-05 | 0.659   | -0.002                 | 0.0004 | 1.24E-05 | 3      |
|                   | cg10975000 | 13  | 28371375  | <i>N.A.</i>     | -0.002     | 0.0005 | 1.12E-05 | 0.659   | -0.003                 | 0.001  | 1.02E-04 | 28     |
|                   | cg06220958 | 17  | 10452851  | <i>MYH2</i>     | 0.011      | 0.002  | 1.24E-05 | 0.659   | 0.011                  | 0.002  | 1.10E-05 | 7      |
|                   | cg25462190 | 5   | 177547067 | <i>N4BP3</i>    | -0.007     | 0.002  | 1.32E-05 | 0.659   | -0.007                 | 0.002  | 2.45E-05 | 6      |
|                   | cg11944797 | 13  | 99135711  | <i>STK24</i>    | -0.001     | 0.0003 | 1.38E-05 | 0.659   | -0.001                 | 0.001  | 2.02E-02 | 8      |
|                   | cg04635504 | 11  | 2829241   | <i>KCNQ1</i>    | -0.005     | 0.001  | 1.61E-05 | 0.664   | -0.005                 | 0.001  | 2.12E-05 | 5      |
| Railway Lden      | cg25201280 | 15  | 35838552  | <i>ATPBD4</i>   | -0.001     | 0.0002 | 1.74E-07 | 0.075   | -0.001                 | 0.0002 | 2.07E-05 | 13     |
|                   | cg24653263 | 5   | 38258335  | <i>EGFLAM</i>   | -0.003     | 0.001  | 8.97E-07 | 0.193   | -0.004                 | 0.001  | 1.05E-05 | 29     |
|                   | cg16825060 | 8   | 144242342 | <i>LY6H</i>     | -0.003     | 0.001  | 2.34E-06 | 0.256   | -0.003                 | 0.001  | 1.41E-06 | 6      |
|                   | cg23468045 | 5   | 12669584  | <i>N.A.</i>     | 0.001      | 0.0002 | 2.37E-06 | 0.256   | 0.001                  | 0.0003 | 6.01E-06 | 13     |
|                   | cg19270309 | 17  | 77712853  | <i>ENPP7</i>    | 0.002      | 0.0005 | 3.25E-06 | 0.266   | 0.003                  | 0.0005 | 2.19E-06 | 37     |
|                   | cg07461273 | 7   | 99697172  | <i>MCM7</i>     | -0.004     | 0.001  | 3.78E-06 | 0.266   | -0.004                 | 0.001  | 3.23E-06 | 2      |
|                   | cg01301319 | 7   | 27153580  | <i>HOXA3</i>    | -0.003     | 0.001  | 4.60E-06 | 0.266   | -0.003                 | 0.001  | 5.43E-06 | 7      |
|                   | cg23113715 | 22  | 25800663  | <i>N.A.</i>     | -0.004     | 0.001  | 5.79E-06 | 0.266   | -0.005                 | 0.001  | 1.22E-05 | 38     |
|                   | cg13402217 | 1   | 151584375 | <i>SNX27</i>    | -0.003     | 0.001  | 6.03E-06 | 0.266   | -0.003                 | 0.001  | 6.03E-06 | 0      |
|                   | cg24047259 | 14  | 65347275  | <i>N.A.</i>     | -0.001     | 0.0003 | 7.35E-06 | 0.266   | -0.001                 | 0.0003 | 7.86E-06 | 9      |
| Road traffic Lden | cg09129334 | 13  | 111837676 | <i>ARHGEF7</i>  | -0.007     | 0.001  | 1.73E-06 | 0.384   | -0.007                 | 0.002  | 1.80E-06 | 3      |
|                   | cg17383236 | 7   | 100167504 | <i>N.A.</i>     | -0.002     | 0.0005 | 2.76E-06 | 0.384   | -0.003                 | 0.001  | 2.10E-06 | 4      |
|                   | cg01066220 | 6   | 31696240  | <i>DDAH2</i>    | 0.001      | 0.0001 | 3.48E-06 | 0.384   | 0.0005                 | 0.0001 | 3.72E-06 | 8      |

|                   |            |    |           |                 |         |        |          |       |         |        |          |    |
|-------------------|------------|----|-----------|-----------------|---------|--------|----------|-------|---------|--------|----------|----|
|                   | cg23910243 | 16 | 31484618  | <i>TGFB111</i>  | -0.002  | 0.0005 | 4.32E-06 | 0.384 | -0.002  | 0.0005 | 2.68E-06 | 20 |
|                   | cg06646021 | 1  | 229406520 | <i>RAB4A</i>    | -0.005  | 0.001  | 4.47E-06 | 0.384 | -0.005  | 0.001  | 4.31E-06 | 8  |
|                   | cg03066594 | 20 | 10415919  | <i>C20orf94</i> | 0.0005  | 0.0001 | 6.00E-06 | 0.386 | 0.0005  | 0.0001 | 7.00E-06 | 3  |
|                   | cg03966094 | 22 | 21058792  | <i>TMEM191A</i> | -0.003  | 0.001  | 7.06E-06 | 0.386 | -0.003  | 0.001  | 7.06E-06 | 0  |
|                   | cg13948857 | 5  | 131763756 | <i>C5orf56</i>  | -0.003  | 0.001  | 7.17E-06 | 0.386 | -0.003  | 0.001  | 7.17E-06 | 0  |
|                   | cg08351004 | 2  | 172965650 | <i>DLX2</i>     | -0.002  | 0.0005 | 9.53E-06 | 0.456 | -0.002  | 0.0005 | 1.95E-04 | 24 |
|                   | cg13777730 | 1  | 234793300 | <i>N.A.</i>     | -0.003  | 0.001  | 1.07E-05 | 0.458 | -0.003  | 0.001  | 1.07E-05 | 0  |
| NO <sub>2</sub>   | cg04337651 | 2  | 239344738 | <i>ASB1</i>     | 0.004   | 0.001  | 2.06E-06 | 0.657 | 0.004   | 0.001  | 2.06E-06 | 0  |
|                   | cg18776472 | 10 | 50732819  | <i>ERCC6</i>    | -0.001  | 0.0002 | 8.20E-06 | 0.657 | -0.001  | 0.0002 | 3.32E-04 | 28 |
|                   | cg18601596 | 6  | 39283313  | <i>KCNK16</i>   | 0.006   | 0.001  | 8.21E-06 | 0.657 | 0.006   | 0.001  | 8.21E-06 | 0  |
|                   | cg12392998 | 17 | 79550668  | <i>NPLOC4</i>   | -0.002  | 0.0004 | 8.72E-06 | 0.657 | -0.002  | 0.001  | 1.05E-03 | 10 |
|                   | cg16550606 | 13 | 50160670  | <i>RCBTB1</i>   | 0.004   | 0.001  | 1.33E-05 | 0.657 | 0.004   | 0.001  | 1.06E-05 | 1  |
|                   | cg25266109 | 19 | 12404608  | <i>ZNF44</i>    | -0.0004 | 0.0001 | 1.38E-05 | 0.657 | -0.0005 | 0.0001 | 1.06E-06 | 12 |
|                   | cg01746514 | 14 | 24520922  | <i>LRRC16B</i>  | -0.001  | 0.0002 | 1.43E-05 | 0.657 | -0.001  | 0.0003 | 2.27E-05 | 38 |
|                   | cg15811902 | 15 | 75918385  | <i>SNUPN</i>    | -0.002  | 0.0005 | 1.61E-05 | 0.657 | -0.002  | 0.0005 | 1.74E-05 | 3  |
|                   | cg26898336 | 17 | 15244519  | <i>TEKT3</i>    | 0.002   | 0.0005 | 1.65E-05 | 0.657 | 0.002   | 0.001  | 2.87E-04 | 22 |
|                   | cg21099332 | 5  | 39270715  | <i>N.A.</i>     | 0.004   | 0.001  | 1.66E-05 | 0.657 | 0.004   | 0.001  | 1.66E-05 | 0  |
| PM <sub>2.5</sub> | cg26704043 | 6  | 5282702   | <i>FARS2</i>    | 0.014   | 0.003  | 4.18E-07 | 0.180 | 0.014   | 0.003  | 7.73E-07 | 2  |
|                   | cg05157625 | 14 | 93153553  | <i>RIN3</i>     | 0.021   | 0.004  | 1.08E-06 | 0.231 | 0.021   | 0.004  | 1.08E-06 | 0  |
|                   | cg20099458 | 7  | 5272275   | <i>WIPI2</i>    | 0.014   | 0.003  | 1.61E-06 | 0.231 | 0.014   | 0.003  | 2.61E-06 | 11 |
|                   | cg06587257 | 12 | 50452135  | <i>ACCN2</i>    | 0.022   | 0.005  | 2.71E-06 | 0.292 | 0.022   | 0.005  | 4.91E-06 | 14 |
|                   | cg14531665 | 9  | 91058614  | <i>SPINI</i>    | 0.012   | 0.003  | 5.91E-06 | 0.398 | 0.013   | 0.003  | 2.25E-06 | 4  |
|                   | cg06526020 | 6  | 34308880  | <i>NUDT3</i>    | 0.029   | 0.006  | 6.43E-06 | 0.398 | 0.029   | 0.006  | 6.43E-06 | 0  |
|                   | cg21058520 | 6  | 100914733 | <i>N.A.</i>     | 0.004   | 0.001  | 6.76E-06 | 0.398 | 0.009   | 0.001  | 3.14E-10 | 21 |
|                   | cg16259904 | 10 | 134146220 | <i>LRRC27</i>   | 0.027   | 0.006  | 8.90E-06 | 0.398 | 0.027   | 0.006  | 8.90E-06 | 0  |
|                   | cg12770741 | 17 | 883776    | <i>NXN</i>      | 0.018   | 0.004  | 9.15E-06 | 0.398 | 0.018   | 0.004  | 1.13E-05 | 10 |
|                   | cg26750893 | 2  | 38043481  | <i>N.A.</i>     | 0.016   | 0.004  | 1.05E-05 | 0.398 | 0.019   | 0.004  | 1.03E-06 | 2  |

CpG: Cytosine-phosphate-Guanine. CHR: chromosome. SE: standard error. FDR: false discovery rate. EV: extreme methylation values. Lden: day-evening-night noise level. NO<sub>2</sub>: nitrogen dioxide. PM<sub>2.5</sub>: particulate matter with aerodynamic diameter <2.5 µm. Beta coefficients represent increase or decrease in DNA methylation per 10 dB increase in aircraft, railway or road traffic Lden or 10 µg/m<sup>3</sup> increase in NO<sub>2</sub> or PM<sub>2.5</sub>. All estimates were from multi-exposure linear mixed-effects models (containing all exposures), with participant-level random intercept, adjusted for age, sex, education, area, neighborhood socio-economic status, greenness index, smoking status, pack years, passive smoke, consumption of fruits, vegetables and alcohol, asthma status, survey and leukocyte composition. In a preliminary step, DNA methylation β-values were regressed on the Illumina control probe-derived first 30 principal components to correct for correlation structures and technical

bias, and residuals of these regressions covering 430,477 CpGs were used as the technical bias-corrected methylation level at the CpG sites. Extreme values of the residuals (lying beyond three times the interquartile range below the first quartile and above the third quartile at each CpG site) were replaced with their corresponding detection threshold value (“modified winsorization”). The “winsorized” data were then used as the dependent variables in the epigenome-wide association study (main model). N (all) and N (“non-winsorized”) = 1,389 (2,542 observations). *N.A.*: not annotated.

Table S7. Sensitivity of source-specific transportation noise and air pollution-related CpGs to exclusion of leukocyte composition from main model.

| Exposure          | CpG ID     | CHR      | Location     | Gene            | Main model |          |          |         | Main model without leukocytes |          |          |
|-------------------|------------|----------|--------------|-----------------|------------|----------|----------|---------|-------------------------------|----------|----------|
|                   |            |          |              |                 | Beta       | SE       | P-value  | P (FDR) | Beta                          | SE       | P-value  |
| Aircraft Lden     | cg02286155 | 5        | 176826262    | <i>N.A.</i>     | -0.007     | 0.001    | 1.48E-06 | 0.637   | -0.006                        | 0.001    | 1.25E-05 |
|                   | cg15063530 | 2        | 17716941     | <i>N.A.</i>     | -0.009     | 0.002    | 8.14E-06 | 0.659   | -0.009                        | 0.002    | 9.17E-06 |
|                   | cg16218477 | 7        | 1066167      | <i>C7orf50</i>  | -0.004     | 0.001    | 8.53E-06 | 0.659   | -0.004                        | 0.001    | 1.63E-05 |
|                   | cg21602842 | 18       | 46291908     | <i>KIAA0427</i> | -0.005     | 0.001    | 9.84E-06 | 0.659   | -0.005                        | 0.001    | 1.12E-05 |
|                   | cg09042449 | 10       | 44064225     | <i>ZNF239</i>   | -0.002     | 0.0004   | 1.06E-05 | 0.659   | -0.002                        | 0.0004   | 1.47E-05 |
|                   | cg10975000 | 13       | 28371375     | <i>N.A.</i>     | -0.002     | 0.0005   | 1.12E-05 | 0.659   | -0.002                        | 0.001    | 6.39E-05 |
|                   | cg06220958 | 17       | 10452851     | <i>MYH2</i>     | 0.011      | 0.002    | 1.24E-05 | 0.659   | 0.010                         | 0.002    | 2.70E-05 |
|                   | cg25462190 | 5        | 177547067    | <i>N4BP3</i>    | -0.007     | 0.002    | 1.32E-05 | 0.659   | -0.006                        | 0.002    | 2.07E-04 |
|                   | cg11944797 | 13       | 99135711     | <i>STK24</i>    | -0.001     | 0.0003   | 1.38E-05 | 0.659   | -0.001                        | 0.0003   | 1.22E-05 |
| cg04635504        | 11         | 2829241  | <i>KCNQ1</i> | -0.005          | 0.001      | 1.61E-05 | 0.664    | -0.005  | 0.001                         | 3.48E-05 |          |
| Railway Lden      | cg25201280 | 15       | 35838552     | <i>ATPBD4</i>   | -0.001     | 0.0002   | 1.74E-07 | 0.075   | -0.001                        | 0.0001   | 2.14E-07 |
|                   | cg24653263 | 5        | 38258335     | <i>EGFLAM</i>   | -0.003     | 0.001    | 8.97E-07 | 0.193   | -0.004                        | 0.001    | 4.50E-07 |
|                   | cg16825060 | 8        | 144242342    | <i>LY6H</i>     | -0.003     | 0.001    | 2.34E-06 | 0.256   | -0.003                        | 0.001    | 1.99E-06 |
|                   | cg23468045 | 5        | 12669584     | <i>N.A.</i>     | 0.001      | 0.0002   | 2.37E-06 | 0.256   | 0.001                         | 0.0002   | 1.91E-06 |
|                   | cg19270309 | 17       | 77712853     | <i>ENPP7</i>    | 0.002      | 0.0005   | 3.25E-06 | 0.266   | 0.002                         | 0.0005   | 2.96E-06 |
|                   | cg07461273 | 7        | 99697172     | <i>MCM7</i>     | -0.004     | 0.001    | 3.78E-06 | 0.266   | -0.003                        | 0.001    | 1.11E-02 |
|                   | cg01301319 | 7        | 27153580     | <i>HOXA3</i>    | -0.003     | 0.001    | 4.60E-06 | 0.266   | -0.003                        | 0.001    | 6.34E-06 |
|                   | cg23113715 | 22       | 25800663     | <i>N.A.</i>     | -0.004     | 0.001    | 5.79E-06 | 0.266   | -0.005                        | 0.001    | 3.16E-06 |
|                   | cg13402217 | 1        | 151584375    | <i>SNX27</i>    | -0.003     | 0.001    | 6.03E-06 | 0.266   | -0.003                        | 0.001    | 7.94E-06 |
| cg24047259        | 14         | 65347275 | <i>N.A.</i>  | -0.001          | 0.0003     | 7.35E-06 | 0.266    | -0.001  | 0.0003                        | 8.18E-06 |          |
| Road traffic Lden | cg09129334 | 13       | 111837676    | <i>ARHGEF7</i>  | -0.007     | 0.001    | 1.73E-06 | 0.384   | -0.006                        | 0.002    | 1.17E-04 |
|                   | cg17383236 | 7        | 100167504    | <i>N.A.</i>     | -0.002     | 0.0005   | 2.76E-06 | 0.384   | -0.002                        | 0.001    | 8.03E-03 |

|                   |            |    |           |                 |         |        |          |       |         |        |          |
|-------------------|------------|----|-----------|-----------------|---------|--------|----------|-------|---------|--------|----------|
|                   | cg01066220 | 6  | 31696240  | <i>DDAH2</i>    | 0.001   | 0.0001 | 3.48E-06 | 0.384 | 0.001   | 0.0001 | 8.52E-07 |
|                   | cg23910243 | 16 | 31484618  | <i>TGFB111</i>  | -0.002  | 0.0005 | 4.32E-06 | 0.384 | -0.002  | 0.0005 | 1.56E-05 |
|                   | cg06646021 | 1  | 229406520 | <i>RAB4A</i>    | -0.005  | 0.001  | 4.47E-06 | 0.384 | -0.004  | 0.001  | 2.32E-04 |
|                   | cg03066594 | 20 | 10415919  | <i>C20orf94</i> | 0.0005  | 0.0001 | 6.00E-06 | 0.386 | 0.0004  | 0.0001 | 1.56E-05 |
|                   | cg03966094 | 22 | 21058792  | <i>TMEM191A</i> | -0.003  | 0.001  | 7.06E-06 | 0.386 | -0.003  | 0.001  | 3.27E-04 |
|                   | cg13948857 | 5  | 131763756 | <i>C5orf56</i>  | -0.003  | 0.001  | 7.17E-06 | 0.386 | -0.0002 | 0.002  | 9.04E-01 |
|                   | cg08351004 | 2  | 172965650 | <i>DLX2</i>     | -0.002  | 0.0005 | 9.53E-06 | 0.456 | -0.002  | 0.0005 | 3.41E-03 |
|                   | cg13777730 | 1  | 234793300 | <i>N.A.</i>     | -0.003  | 0.001  | 1.07E-05 | 0.458 | -0.001  | 0.001  | 6.03E-01 |
| NO <sub>2</sub>   | cg04337651 | 2  | 239344738 | <i>ASB1</i>     | 0.004   | 0.001  | 2.06E-06 | 0.657 | 0.004   | 0.001  | 1.83E-06 |
|                   | cg18776472 | 10 | 50732819  | <i>ERCC6</i>    | -0.001  | 0.0002 | 8.20E-06 | 0.657 | -0.001  | 0.0002 | 4.64E-06 |
|                   | cg18601596 | 6  | 39283313  | <i>KCNK16</i>   | 0.006   | 0.001  | 8.21E-06 | 0.657 | 0.004   | 0.002  | 6.14E-03 |
|                   | cg12392998 | 17 | 79550668  | <i>NPLOC4</i>   | -0.002  | 0.0004 | 8.72E-06 | 0.657 | -0.002  | 0.0004 | 1.19E-05 |
|                   | cg16550606 | 13 | 50160670  | <i>RCBTB1</i>   | 0.004   | 0.001  | 1.33E-05 | 0.657 | 0.004   | 0.001  | 2.69E-04 |
|                   | cg25266109 | 19 | 12404608  | <i>ZNF44</i>    | -0.0004 | 0.0001 | 1.38E-05 | 0.657 | -0.0004 | 0.0001 | 2.29E-05 |
|                   | cg01746514 | 14 | 24520922  | <i>LRRC16B</i>  | -0.001  | 0.0002 | 1.43E-05 | 0.657 | -0.001  | 0.0002 | 1.31E-05 |
|                   | cg15811902 | 15 | 75918385  | <i>SNUPN</i>    | -0.002  | 0.0005 | 1.61E-05 | 0.657 | -0.002  | 0.0005 | 2.38E-05 |
|                   | cg26898336 | 17 | 15244519  | <i>TEKT3</i>    | 0.002   | 0.0005 | 1.65E-05 | 0.657 | 0.002   | 0.002  | 1.18E-04 |
|                   | cg21099332 | 5  | 39270715  | <i>N.A.</i>     | 0.004   | 0.001  | 1.66E-05 | 0.657 | 0.001   | 0.002  | 5.21E-01 |
| PM <sub>2.5</sub> | cg26704043 | 6  | 5282702   | <i>FARS2</i>    | 0.014   | 0.003  | 4.18E-07 | 0.180 | 0.012   | 0.006  | 4.32E-02 |
|                   | cg05157625 | 14 | 93153553  | <i>RIN3</i>     | 0.021   | 0.004  | 1.08E-06 | 0.231 | 0.021   | 0.004  | 6.14E-07 |
|                   | cg20099458 | 7  | 5272275   | <i>WIPI2</i>    | 0.014   | 0.003  | 1.61E-06 | 0.231 | 0.013   | 0.003  | 1.12E-05 |
|                   | cg06587257 | 12 | 50452135  | <i>ACCN2</i>    | 0.022   | 0.005  | 2.71E-06 | 0.292 | 0.022   | 0.005  | 4.27E-06 |
|                   | cg14531665 | 9  | 91058614  | <i>SPIN1</i>    | 0.012   | 0.003  | 5.91E-06 | 0.398 | 0.009   | 0.006  | 1.47E-01 |
|                   | cg06526020 | 6  | 34308880  | <i>NUDT3</i>    | 0.029   | 0.006  | 6.43E-06 | 0.398 | 0.022   | 0.013  | 8.43E-02 |
|                   | cg21058520 | 6  | 100914733 | <i>N.A.</i>     | 0.004   | 0.001  | 6.76E-06 | 0.398 | 0.004   | 0.001  | 3.61E-06 |
|                   | cg16259904 | 10 | 134146220 | <i>LRRC27</i>   | 0.027   | 0.006  | 8.90E-06 | 0.398 | 0.027   | 0.006  | 1.07E-05 |
|                   | cg12770741 | 17 | 883776    | <i>NXN</i>      | 0.018   | 0.004  | 9.15E-06 | 0.398 | 0.018   | 0.004  | 9.29E-06 |
|                   | cg26750893 | 2  | 38043481  | <i>N.A.</i>     | 0.016   | 0.004  | 1.05E-05 | 0.398 | 0.018   | 0.007  | 6.61E-03 |

CpG: Cytosine-phosphate-Guanine. CHR: chromosome. SE: standard error. EWAS: epigenome-wide association study. Lden: day-evening-night noise level. NO<sub>2</sub>: nitrogen dioxide. PM<sub>2.5</sub>: particulate matter with aerodynamic diameter <2.5 µm. Beta coefficients represent increase or decrease in DNA methylation per 10 dB increase in aircraft, railway or road traffic Lden or 10 µg/m<sup>3</sup> increase in NO<sub>2</sub> or PM<sub>2.5</sub>. Main model estimates were from multi-exposure linear mixed-effects models (containing all five exposures), with participant-level random intercept, adjusted for age, sex, educational level, study area, neighborhood socio-economic status, greenness index, smoking status, smoking pack years, passive smoke, consumption of fruits,

vegetables and alcohol, asthma status, survey and leukocyte composition. In a preliminary step, DNA methylation  $\beta$ -values were regressed on the Illumina control probe-derived first 30 principal components to correct for correlation structures and technical bias, and residuals of these regressions covering 430,477 CpGs were used as the technical bias-corrected methylation level at the CpG sites. Extreme values of the residuals (lying beyond three times the interquartile range below the first quartile and above the third quartile at each CpG site) were replaced with their corresponding detection threshold value (“modified winsorization”). The “winsorized” data were then used as the dependent variables in the EWAS. *N.A.*: not annotated.

Table S8. Association between source-specific transportation noise and air pollution exposures, and leukocyte composition in the SAPALDIA study

| Exposure          | Statistic        | B cell                  | CD4T                   | CD8T                   | Eosinophils              | Monocytes               | Neutrophils             | Natural killer cells   |
|-------------------|------------------|-------------------------|------------------------|------------------------|--------------------------|-------------------------|-------------------------|------------------------|
| Aircraft Lden     | $\beta$ (95% CI) | 0.003 (0.001, 0.005)    | 0.008 (0.003, 0.013)   | 0.007 (0.003, 0.010)   | -0.001 (-0.002, -0.0003) | -0.001 (-0.003, 0.001)  | -0.015 (-0.023, -0.007) | 0.001 (-0.003, 0.004)  |
|                   | <i>P-value</i>   | 0.021                   | 0.003                  | 7.55E-05               | 0.136                    | 0.238                   | 4.01E-04                | 0.691                  |
| Railway Lden      | $\beta$ (95% CI) | 0.001 (-0.001, 0.002)   | -0.002 (-0.005, 0.002) | -0.001 (-0.003, 0.002) | 0.001 (-0.0001, 0.002)   | 0.001 (-0.001, 0.002)   | 0.002 (-0.004, 0.008)   | -0.002 (-0.004, 0.001) |
|                   | <i>P-value</i>   | 0.332                   | 0.309                  | 0.553                  | 0.077                    | 0.380                   | 0.491                   | 0.256                  |
| Road traffic Lden | $\beta$ (95% CI) | -0.0004 (-0.002, 0.001) | 0.003 (-0.0004, 0.006) | -0.001 (-0.003, 0.004) | -0.0003 (-0.001, 0.0005) | -0.001 (-0.002, 0.001)  | -0.003 (-0.008, 0.003)  | 0.002 (-0.002, 0.005)  |
|                   | <i>P-value</i>   | 0.572                   | 0.080                  | 0.453                  | 0.437                    | 0.310                   | 0.375                   | 0.077                  |
| NO <sub>2</sub>   | $\beta$ (95% CI) | 0.00001 (-0.001, 0.001) | -0.002 (-0.005, 0.001) | 0.001 (-0.001, 0.001)  | 0.0001 (-0.001, 0.001)   | -0.001 (-0.002, 0.001)  | -0.00001 (0.006, 0.006) | 0.0004 (-0.002, 0.003) |
|                   | <i>P-value</i>   | 0.991                   | 0.171                  | 0.171                  | 0.718                    | 0.458                   | 0.998                   | 0.743                  |
| PM <sub>2.5</sub> | $\beta$ (95% CI) | 0.005 (0.002, 0.008)    | 0.005 (-0.001, 0.012)  | 0.013 (0.009, 0.017)   | 0.0004 (-0.001, 0.002)   | -0.004 (-0.006, -0.001) | -0.009 (-0.020, 0.001)  | -0.003 (-0.008, 0.001) |
|                   | <i>P-value</i>   | 2.44E-04                | 0.090                  | 3.05E-09               | 0.586                    | 0.011                   | 0.087                   | 0.176                  |

SAPALDIA: Swiss cohort study on air pollution and lung and heart diseases in adults. Lden: day-evening-night noise level. NO<sub>2</sub>: nitrogen dioxide. PM<sub>2.5</sub>: particulate matter with aerodynamic diameter <2.5  $\mu\text{m}$ . All estimates represent change in mean leukocyte type per 10 dB of aircraft, railway or road traffic Lden, and per 10  $\mu\text{g}/\text{m}^3$  of NO<sub>2</sub> or PM<sub>2.5</sub>, and derive from linear mixed-effects multi-exposure models adjusted for noise truncation indicators, with random intercept at the level of the participant. Multi-exposure models contained all five exposures and noise truncation indicators at the same time.

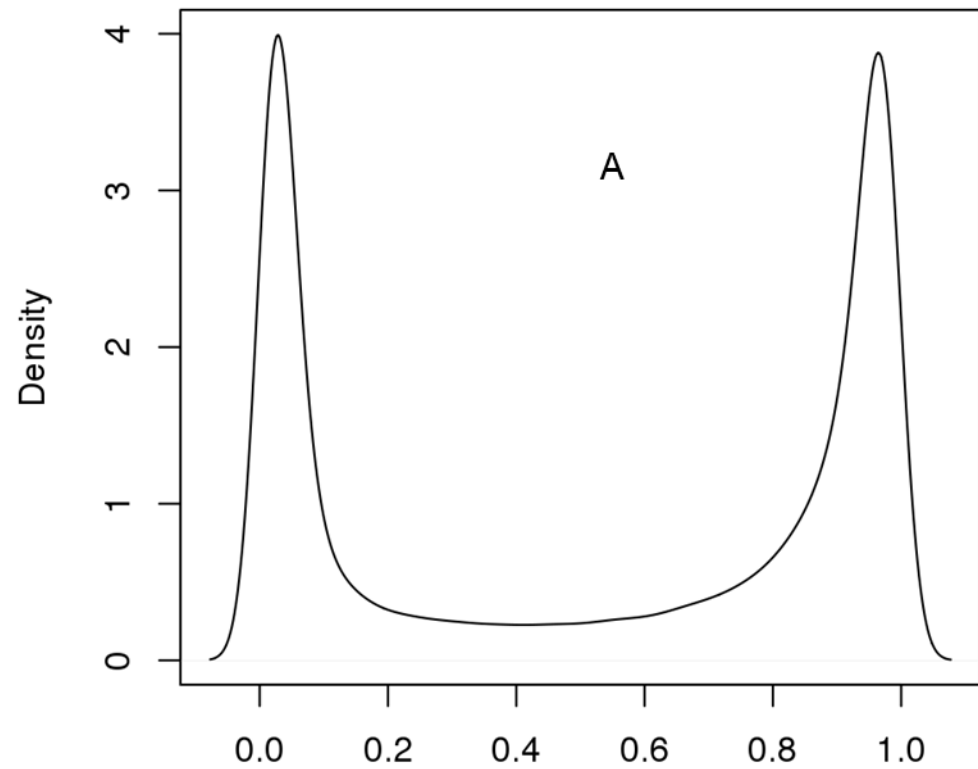

N = 468359 Bandwidth = 0.02714

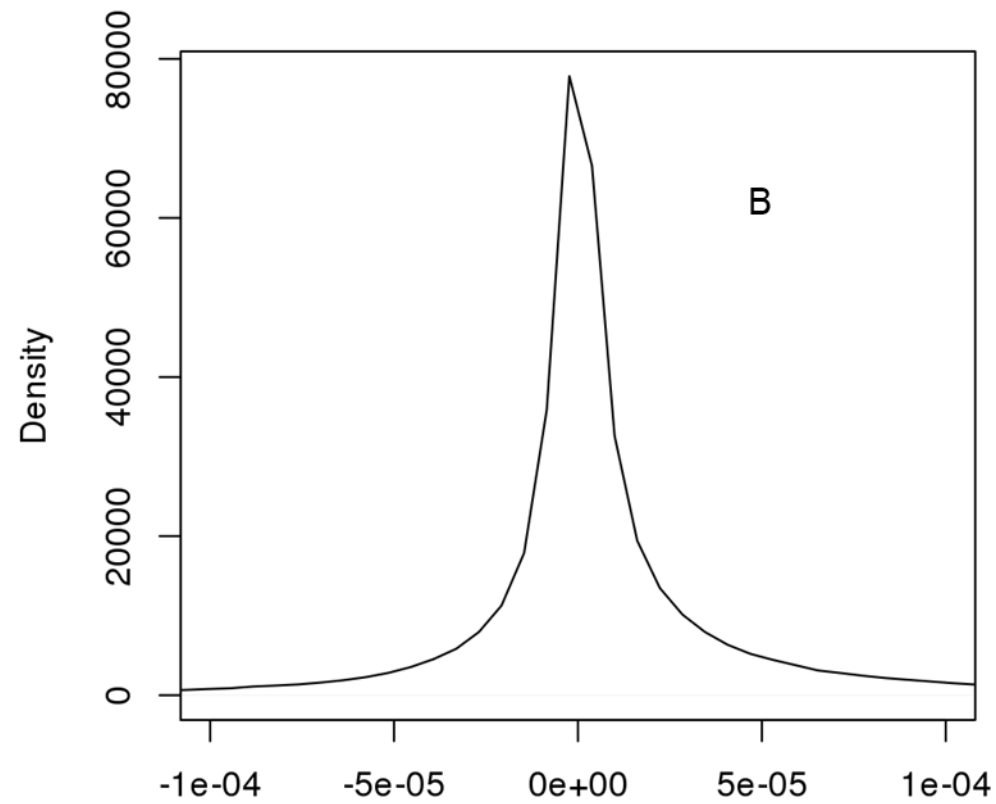

N = 468326 Bandwidth = 1.033e-06

Figure S1. Distributions of the BMIQ-normalized beta values (A) and technical bias-corrected residuals (B) in the SAPALDIA study. SAPALDIA: Swiss cohort study on air pollution and lung and heart diseases in adults.



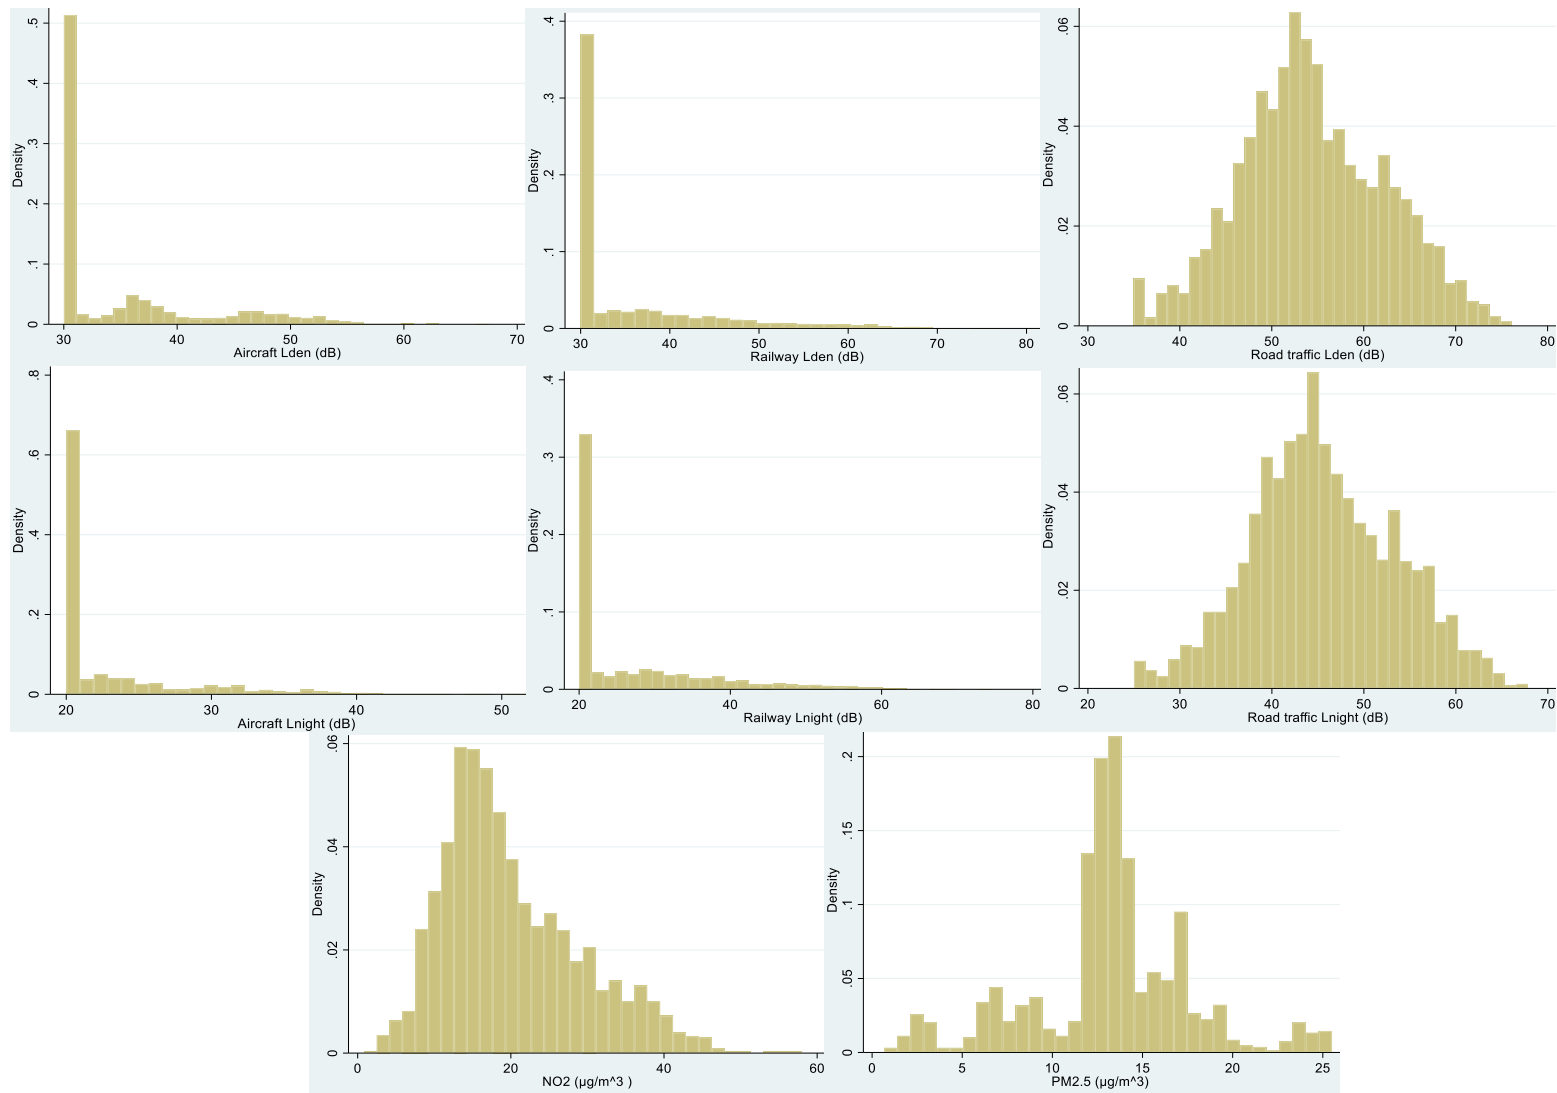

Figure S2. Distribution of transportation noise and air pollution parameters in the present study.

Lden: day-evening night noise level. Lnight: nighttime noise level. NO<sub>2</sub>: nitrogen dioxide; PM<sub>2.5</sub>: particulate matter with aerodynamic diameter <2.5 µm.
