# Supplementary material
Source: PubMed Central journal article supplement (PMC7263738)
Supplement: ehp6174.smcontents.508.pdf [file ehp6174.smcontents.508.pdf]

**Note to readers with disabilities:** *EHP* strives to ensure that all journal content is accessible to all readers. However, some figures and Supplemental Material published in *EHP* articles may not conform to [508 standards](#) due to the complexity of the information being presented. If you need assistance accessing journal content, please contact [ehp508@niehs.nih.gov](mailto:ehp508@niehs.nih.gov). Our staff will work with you to assess and meet your accessibility needs within 3 working days.

### **Supplemental Material**

#### **Genome-Wide DNA Methylation in Peripheral Blood and Long-Term Exposure to Source-Specific Transportation Noise and Air Pollution: The SAPALDIA Study**

Ikenna C. Eze, Ayoung Jeong, Emmanuel Schaffner, Faisal I. Rezwan, Akram Ghantous, Maria Foraster, Danielle Vienneau, Florian Kronenberg, Zdenko Herceg, Paolo Vineis, Mark Brink, Jean-Marc Wunderli, Christian Schindler, Christian Cajochen, Martin Röösl, John W. Holloway, Medea Imboden, and Nicole Probst-Hensch

#### **Table of Contents**

**Table S1.** Spearman rank correlations of transportation noise and air pollutions exposures among the SAPALDIA participants included in the present study.

**Table S2.** Summary of the included participants, stratified and survey and nested study.

**Table S3.** Top ten CpGs independently associated with source-specific transportation noise and air pollution in the SAPALDIA study, single exposure models.

**Table S4.** Top ten CpGs independently associated with source-specific transportation noise and air pollution in the multi-exposure model, stratified by nested study.

**Table S5.** Sensitivity of source-specific transportation noise and air pollution-related CpGs to nighttime window-opening behavior of participants.

**Table S6.** Sensitivity of source-specific transportation noise and air pollution-related CpGs to “non-winsorization” of extreme methylation values.

**Table S7.** Sensitivity of source-specific transportation noise and air pollution-related CpGs to exclusion of leukocyte composition from main model.

**Table S8.** Association between source-specific transportation noise and air pollution exposures, and leukocyte composition in the SAPALDIA study.

**Figure S1.** Distributions of the BMIQ-normalized beta values (A) and technical bias-corrected residuals (B) in the SAPALDIA study. SAPALDIA: Swiss cohort study on air pollution and lung and heart diseases in adults.

**Figure S2.** Distribution of transportation noise and air pollution parameters in the present study.

**Additional File-** Excel Document
